# Supplementary material for: A green flexible and wearable biosensor based on carbon nanofibers for sensitive detection of uric acid in artificial urine
Source: Royal Society of Chemistry journal article supplement (doi:10.1039/d2tb01547a), 2022-01-01
Supplement: d2tb01547a6.pdf [file d2tb01547a6.pdf]

1

2

## Supporting Information

3 **Green flexible and wearable biosensor based on carbon**  
4 **nanofibers for sensitive detection of uric acid in artificial**  
5 **urine**

6 Hao Zheng <sup>a,b,c</sup>, Xiao Han <sup>b,c</sup>, Qiulin Wei <sup>b,c</sup>, Xinliang Liu <sup>a</sup>, Yao Li <sup>a,b,c</sup> \*, Jinghui  
7 Zhou <sup>b,c</sup> \*

8 a. Guangxi Key Laboratory of Clean Pulp & Papermaking and Pollution Control,  
9 College of Light Industry and Food Engineering, Guangxi University, Nanning  
10 530004, P. R. China.

11 b. Collaborative Innovation Center for Lignocellulosic Biorefinery, Dalian, Liaoning  
12 Province, 116034, P. R. China.

13 c. College of Light Industry and Chemical Engineering, Dalian, Liaoning Province,  
14 116034, P. R. China.

15 \* To whom correspondence should be addressed.

16 China. E-mail: liyaodlpu@163.com

17 China. E-mail: zhoujh@dlpu.edu.cn

18

19

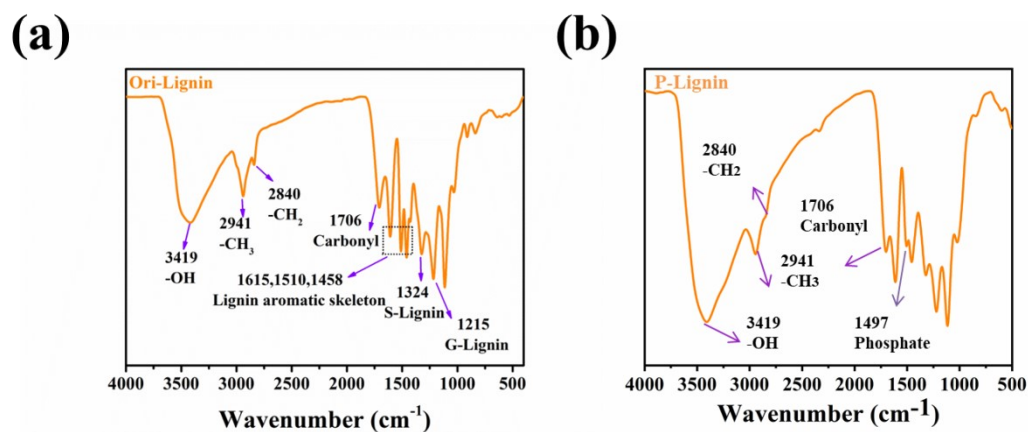

20

21 **Fig. S1** FTIR spectra of the raw materials (OL) and of these materials subject to

22 phosphoric acid (PL)

23

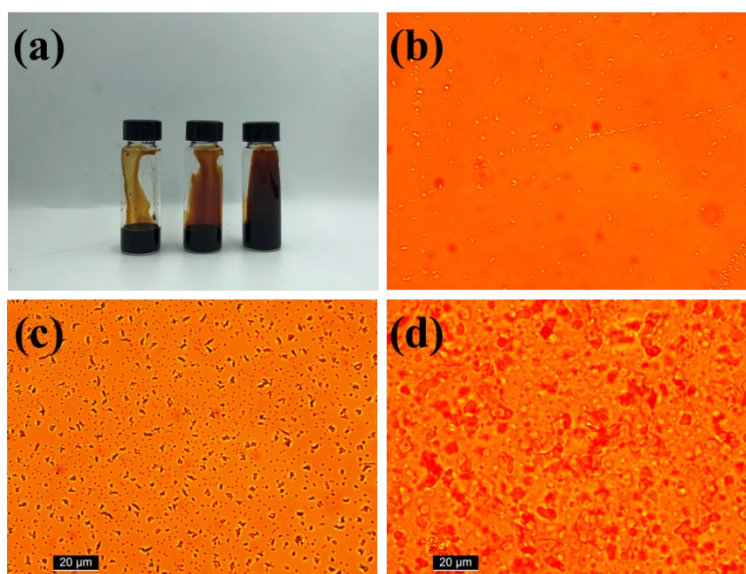

24

25 **Fig. S2** FTIR spectra of the raw materials (OL) and of these materials subject to

26 phosphoric acid (PL)

27

28

29

30

31

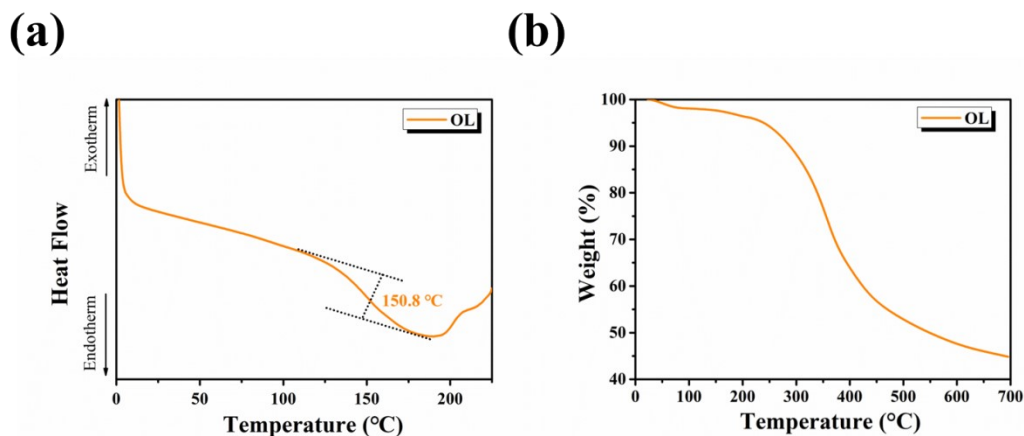

32

33 **Fig. S3** Basic properties of original lignin (a) DSC spectra and (b) TGA spectra

34

35

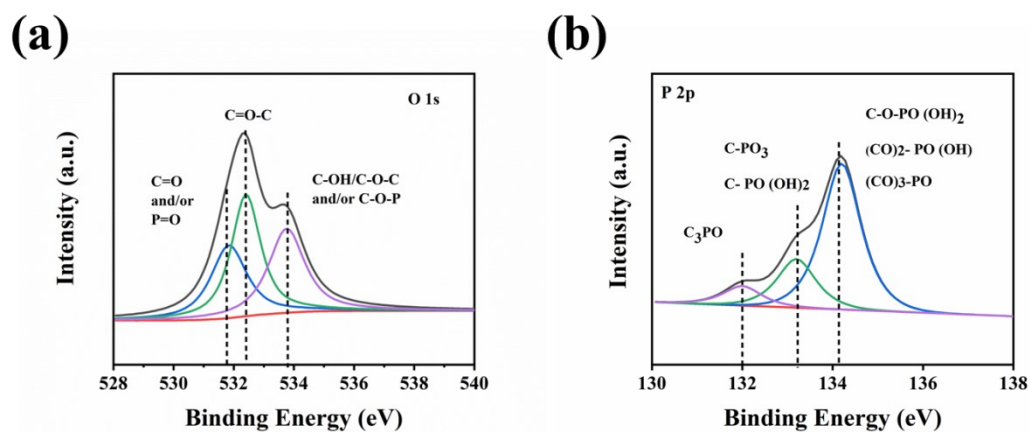

36

37 **Fig. S4** (a) O 1s and (b) P 2p XPS deconvoluted spectra of CNFs-3 fibers

38

39

40

41

42

43

44

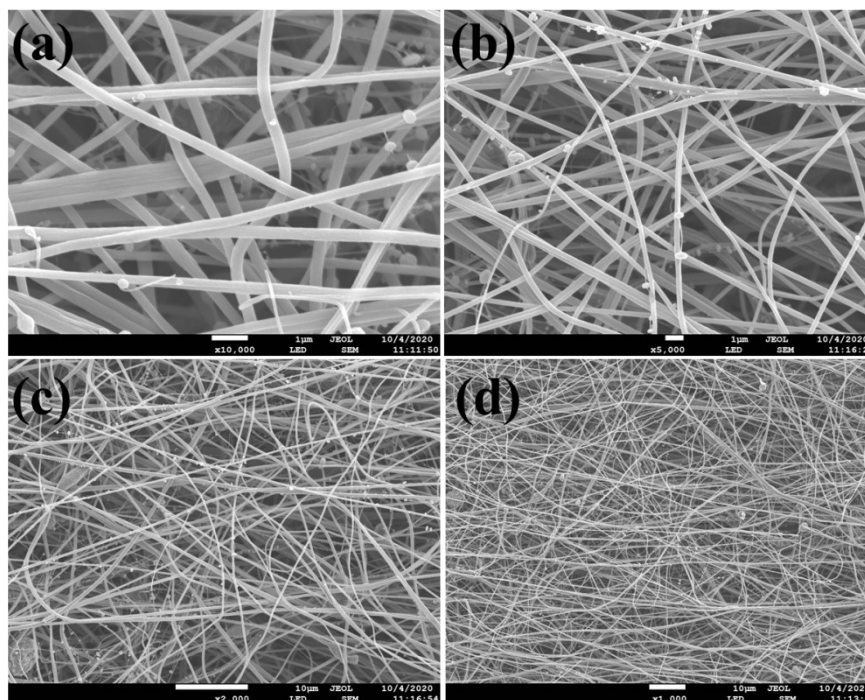

45

46

**Fig. S5** SEM images of CNFs-3 after a certain compression

47

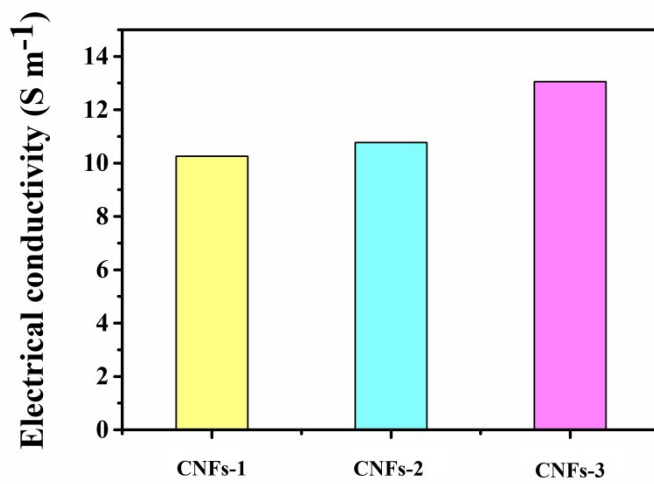

48

**Fig. S6** Electrical conductivity curve of the free-standing carbon nanofibers

50

51

52 As shown in **Fig. S7**, PFs framework can be folded repeatedly without fracture,  
53 demonstrating an excellent foldability. The foldability and electrical conductivity of  
54 the biomass-based CNFs are shown in Fig. S7b and S7c. Comparing to many other  
55 flexible electrode materials which can only bear limited bending, this biomass-based  
56 CNFs exhibits a much better mechanical flexibility. Therefore, repeated and  
57 continuous physiological monitoring can be achieved. It has a broad application  
58 prospect in flexible wearable, electronic skin, flexible sensing and other fields.

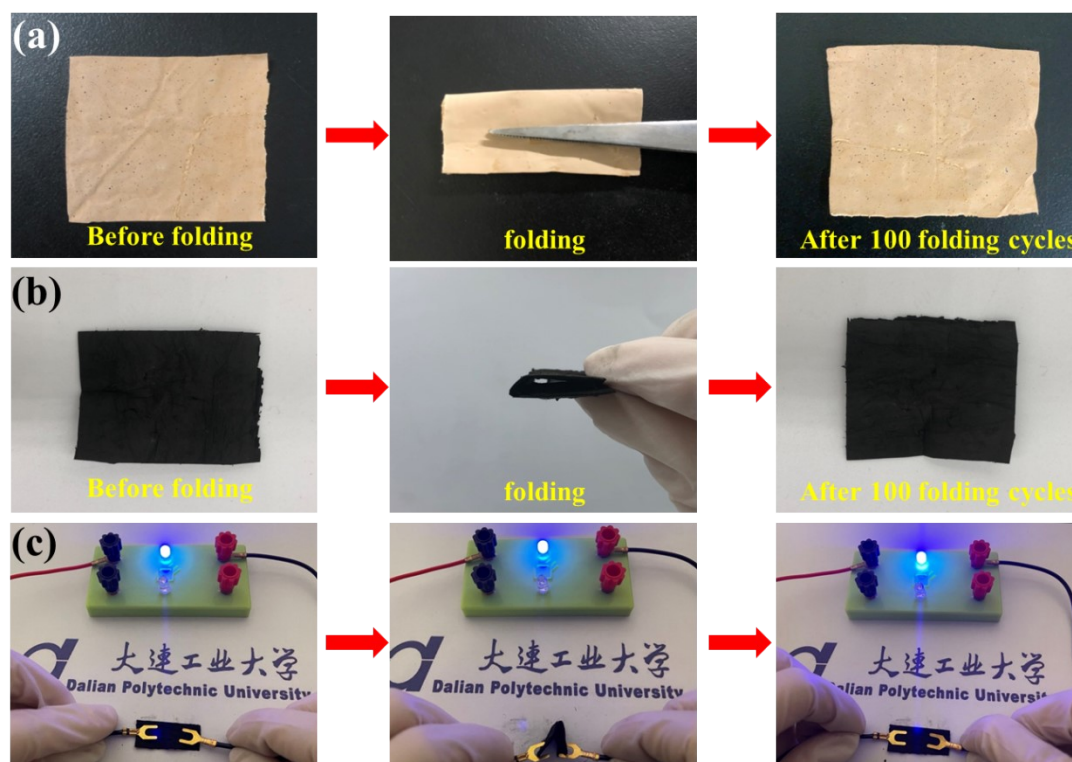

59  
60 **Fig. S7** Optical photographs of nanofibers framework (a) PFs-3, (b) CNFs-3, and (c) a circuit  
61 using the composite as an electrical connection to light a LED under the same states.

62

63

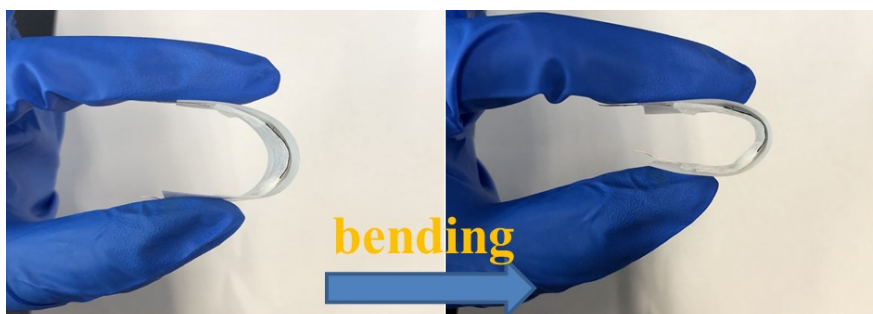

64

65 **Fig. S8** Flexibility and mechanical strength testing of wearable biosensors

66

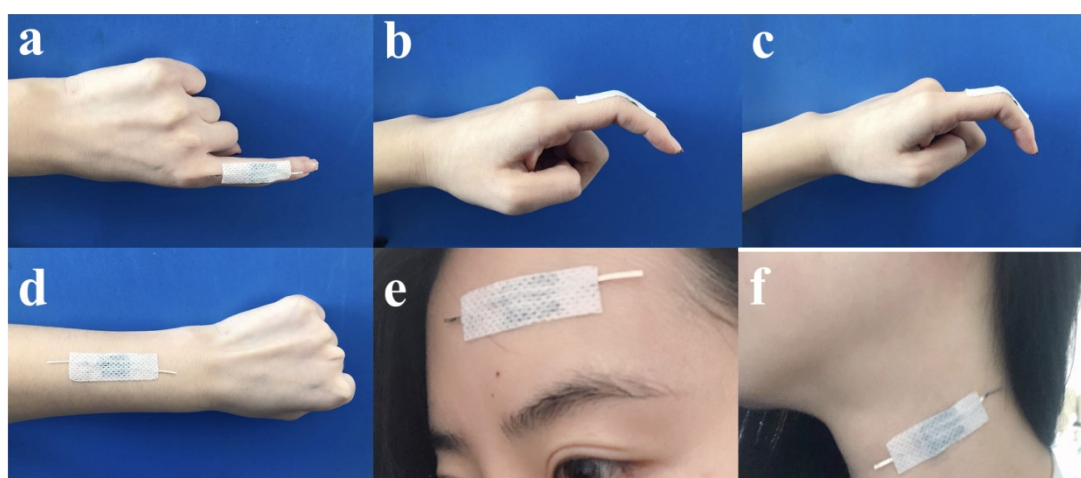

67

68 **Fig. S9** (a) Demonstration photographs of the wearable biosensors conformably  
69 attached on different parts of human body for practical applications.

70

71

72

73 **Table S1** Element analysis of PFs with different phosphorylated lignin content

| Sample | Element content (wt%) |       |       |      |       |        |      |
|--------|-----------------------|-------|-------|------|-------|--------|------|
|        | C                     | H     | O     | N    | S     | H/C    | O/C  |
| PFs-1  | 45.92                 | 5.392 | 45.36 | 1.74 | 0.588 | 0.1174 | 0.98 |
| PFs-2  | 46.63                 | 5.507 | 45.54 | 1.8  | 0.523 | 0.118  | 0.97 |
| PFs-3  | 50.7                  | 5.976 | 42.11 | 0.92 | 0.295 | 0.1178 | 0.83 |

74
